# Supplementary figures and images for: Characterization of silver-polymer core–shell nanoparticles using electron microscopy
Source: Royal Society of Chemistry journal article supplement (doi:10.1039/c7nr09517a), 2018-01-01

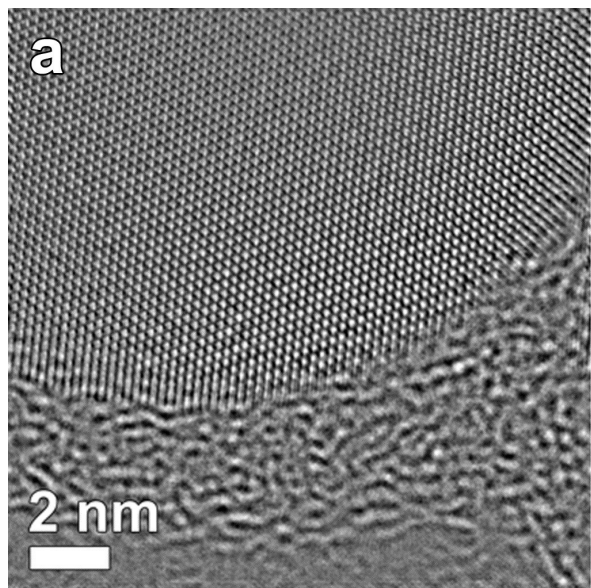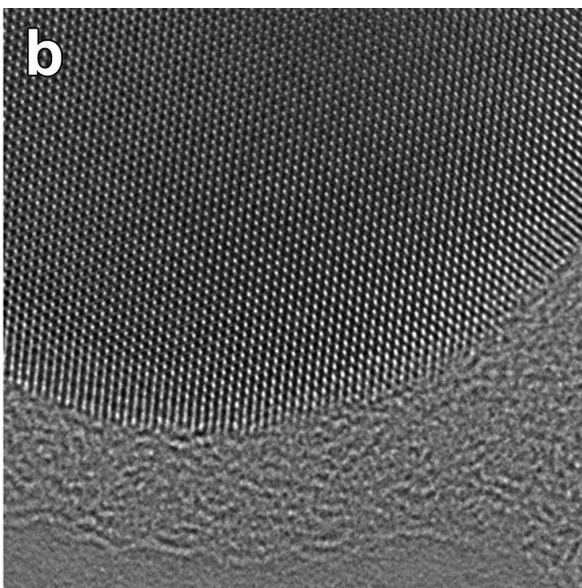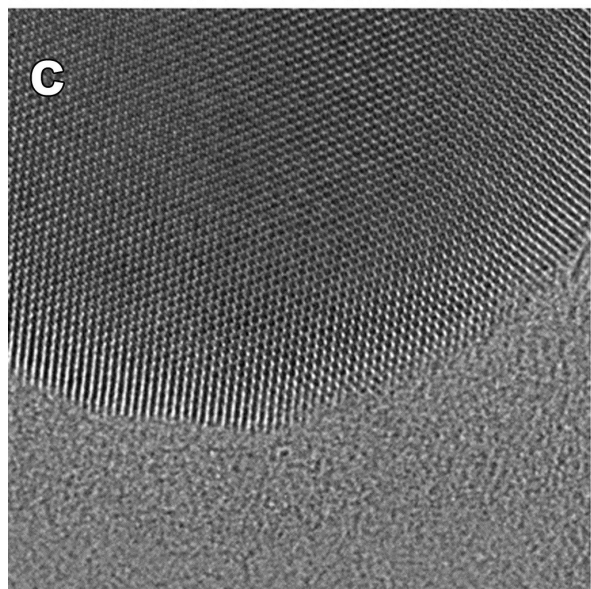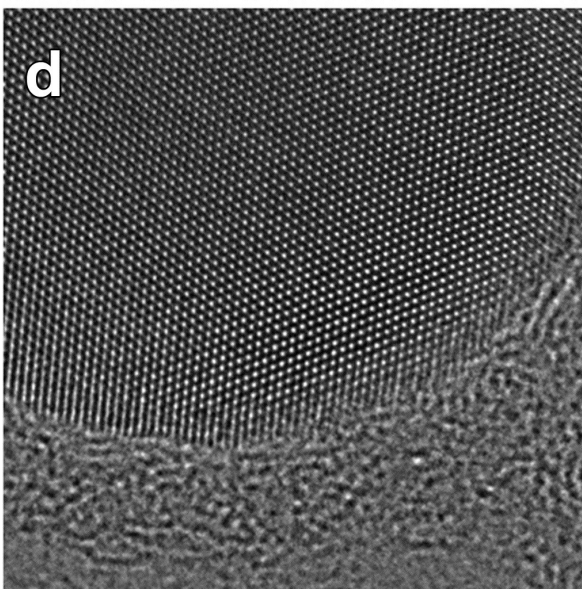

Supplement: c7nr09517a3.pdf [file c7nr09517a3.pdf]
